# Supplementary material
Source: Springer Nature journal article supplement (https://www.springermedizin.de/resource/supplementary/12877_2009_320_MOESM5_ESM.pdf/9439382)

Cumulative incidence of fracture

10%

5%

0%

T1 (unconfirmed)

T3 (confirmed)

T2 (moderately confirmed)

0

1

2

3

4

5

Follow up years

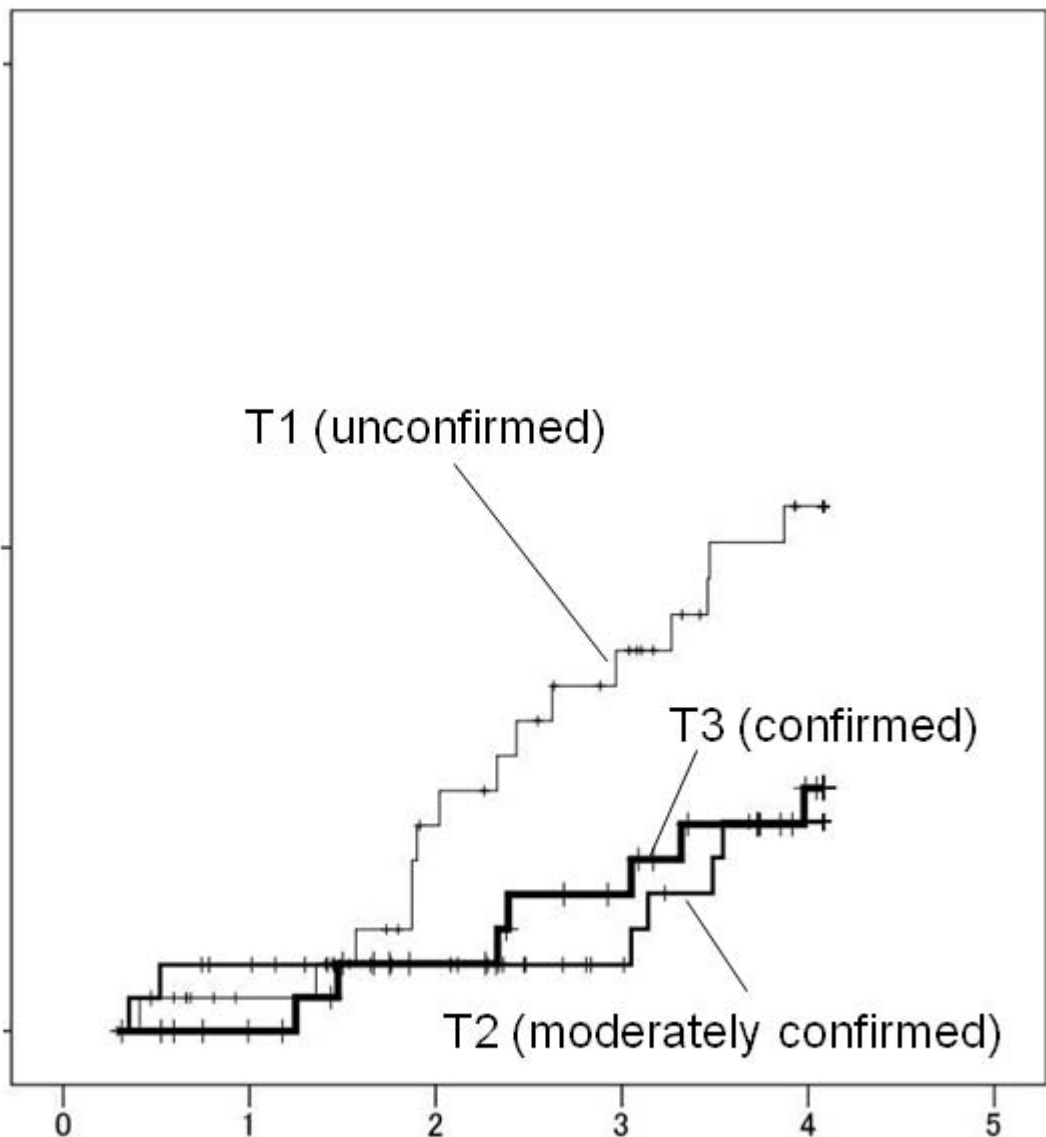

Supplement: MOESM5 [file 9439382]
